# Supplementary material
Source: Springer Nature journal article supplement (https://www.springermedizin.de/resource/supplementary/12885_2013_5259_MOESM8_ESM.pdf/9465254)

**A****MTT assay PANC-1**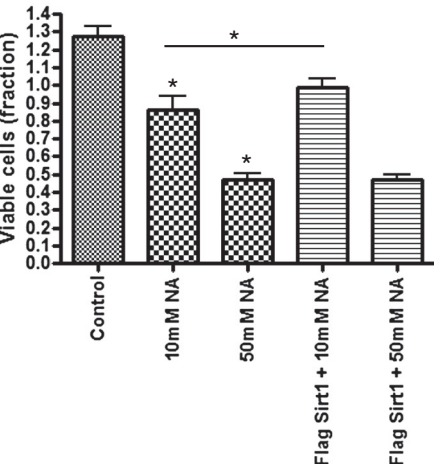**B****MTT assay MiaPaCa-2**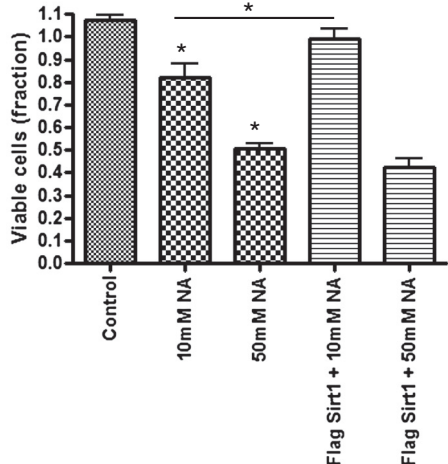

Supplement: MOESM8 [file 9465254]
